# Supplementary material for: Development and Evaluation of the CASTLE Trial Online Sleep Intervention for Parents of Children with Epilepsy
Source: Frontiers journal article supplement (doi:10.3389/fpsyg.2021.679804), 2021-07-02
Supplement: Data_Sheet_1.pdf [file Data_Sheet_1.pdf]

## Supplementary Materials

### Appendix 1. Descriptive information about children of the participants

|           | Age | Gender | Seizure timing                                        | Parent reported sleep problems*                                                                                                                 |
|-----------|-----|--------|-------------------------------------------------------|-------------------------------------------------------------------------------------------------------------------------------------------------|
| <b>P1</b> | 10  | M      | Transitioning between sleep and wake                  | Current: settling, night waking, sleep-related anxiety, unsettled sleep, co-sleeping<br>Past: sleep terrors, sleep walking                      |
| <b>P2</b> | 15  | M      | Daytime and during sleep                              | Current: settling, sleep-related anxiety, night and early morning waking, sleepwalking, sleep terrors, daytime sleepiness<br>Past: room sharing |
| <b>P3</b> | 10  | F      | Transitioning between sleep and wake                  | Current: night waking, sleep terrors, sleep-related anxiety, co-sleeping<br>Past: morning waking difficulty                                     |
| <b>P4</b> | 11  | M      | Transitioning between sleep and wake                  | Current: settling, sleep-related anxiety, night waking<br>Past: room sharing                                                                    |
| <b>P5</b> | 5   | F      | Daytime. 1 year without seizures (due to medication)  | Current: settling, night waking, sleep terrors, sleep-related anxiety, room sharing, co-sleeping, daytime sleepiness                            |
| <b>P6</b> | 9   | M      | During sleep                                          | Current: settling, night and early morning waking<br>Past: daytime sleepiness and co-sleeping                                                   |
| <b>P7</b> | 13  | F      | During sleep and transitioning between sleep and wake | Current: settling, morning waking difficulty                                                                                                    |
| <b>P8</b> | 7   | M      | Transitioning between sleep and wake                  | Current: night and early morning waking, co-sleeping                                                                                            |

|           |    |   |                                                  |                                                                                                         |
|-----------|----|---|--------------------------------------------------|---------------------------------------------------------------------------------------------------------|
| <b>P9</b> | 13 | M | Daytime and transitioning between sleep and wake | Current: settling, night waking, poor sleep quality, daytime sleepiness, possible restless leg syndrome |
|-----------|----|---|--------------------------------------------------|---------------------------------------------------------------------------------------------------------|

\*Current sleep problems refers to problems which are currently present but it should be noted that the duration of these problems is generally longstanding (since infancy or beyond), with most problems also being also present in the past. Past sleep problems refers to problems which have now resolved but which were significant problems at some point.

## Appendix 2. COSI evaluation questionnaire

Section One - The questions in this section ask about how easy or difficult you found it to access and use this online sleep programme.

| Item number and question                                                                       | Response options                                |
|------------------------------------------------------------------------------------------------|-------------------------------------------------|
| 1) Were you able to log on to the intervention website?                                        | Always<br>Often<br>Sometimes<br>Rarely<br>Never |
| 2) Were you able to access the webpages of content?                                            | Always<br>Often<br>Sometimes<br>Rarely<br>Never |
| 3) Were you able to see the videos?                                                            | Always<br>Often<br>Sometimes<br>Rarely<br>Never |
| 4) Were you able to hear the videos?                                                           | Always<br>Often<br>Sometimes<br>Rarely<br>Never |
| 5) Were you able to access the quizzes?                                                        | Always<br>Often<br>Sometimes<br>Rarely<br>Never |
| 6) Were you able to print off any materials you wanted to?                                     | Always<br>Often<br>Sometimes<br>Rarely<br>Never |
| 7) Were you able to find your way/navigate around the sleep programme website?                 | Always<br>Often<br>Sometimes<br>Rarely<br>Never |
| 8) Would you recommend this sleep programme to other families who have children with epilepsy? | Always<br>Often<br>Sometimes<br>Rarely<br>Never |

Section Two - The questions in this section are about the techniques suggested in the sleep programme. In the final version of this sleep programme we will ask parents to tell us, for each technique, if they tried to use it, how helpful they found it and how often they were able to put it into practice. You do not need to tell us these things (since we do not expect you to have tried out the ideas in the sleep programme) but please read the questions and, for each technique we have included, tell us how acceptable you think it is to include this technique in the programme. Even if you personally would not choose to use this technique do you think

it's OK to suggest that some parents of children with epilepsy might find it helpful for dealing with their child's sleep difficulties?

For each of the techniques listed below please tell us how acceptable you think it is to include these in the intervention by selecting ONE response for each technique.

| <b>Technique</b>                                                                                                  | <b>Response options</b>                                                                                   | <b>Follow up</b>                                                                                      |
|-------------------------------------------------------------------------------------------------------------------|-----------------------------------------------------------------------------------------------------------|-------------------------------------------------------------------------------------------------------|
|                                                                                                                   | Do you think the technique is...                                                                          | If you selected unacceptable or very unacceptable, why do you think this technique is not acceptable? |
| Make changes to my child's sleep environment (e.g. curtains, bedding, temperature, noise level)                   | Very acceptable<br>Acceptable<br>Neither acceptable nor unacceptable<br>Unacceptable<br>Very unacceptable |                                                                                                       |
| Make sure my child's sleep wake times were regular (e.g. consistent bed and morning wake times)                   | Very acceptable<br>Acceptable<br>Neither acceptable nor unacceptable<br>Unacceptable<br>Very unacceptable |                                                                                                       |
| Introduce a regular or tweak an existing bedtime routine to include calming activities in lead up to sleep period | Very acceptable<br>Acceptable<br>Neither acceptable nor unacceptable<br>Unacceptable<br>Very unacceptable |                                                                                                       |
| Avoid stimulating things around the sleep period (e.g. computer games or exercise)                                | Very acceptable<br>Acceptable<br>Neither acceptable nor unacceptable<br>Unacceptable<br>Very unacceptable |                                                                                                       |
| Avoid or reduce child's intake of food or drinks that contain caffeine                                            | Very acceptable<br>Acceptable<br>Neither acceptable nor unacceptable<br>Unacceptable<br>Very unacceptable |                                                                                                       |
| Remove electronics from your child's bedroom                                                                      | Very acceptable<br>Acceptable<br>Neither acceptable nor unacceptable<br>Unacceptable<br>Very unacceptable |                                                                                                       |
| Spend time outdoors and in natural light                                                                          | Very acceptable<br>Acceptable<br>Neither acceptable nor unacceptable<br>Unacceptable<br>Very unacceptable |                                                                                                       |
| Avoid long or excessive naps                                                                                      | Very acceptable<br>Acceptable<br>Neither acceptable nor unacceptable<br>Unacceptable<br>Very unacceptable |                                                                                                       |

|                                                                                                                                                                                 |                                                                                                           |  |
|---------------------------------------------------------------------------------------------------------------------------------------------------------------------------------|-----------------------------------------------------------------------------------------------------------|--|
| Limit the amount of time your child is in bed but not sleepy                                                                                                                    | Very acceptable<br>Acceptable<br>Neither acceptable nor unacceptable<br>Unacceptable<br>Very unacceptable |  |
| Return child to their own bed if they come out of their bed                                                                                                                     | Very acceptable<br>Acceptable<br>Neither acceptable nor unacceptable<br>Unacceptable<br>Very unacceptable |  |
| Encouraging your child to stay in their room until a set time in the morning                                                                                                    | Very acceptable<br>Acceptable<br>Neither acceptable nor unacceptable<br>Unacceptable<br>Very unacceptable |  |
| The camping out method - Staying with my child if they were awake during the sleep period but gradually reducing my presence or contact                                         | Very acceptable<br>Acceptable<br>Neither acceptable nor unacceptable<br>Unacceptable<br>Very unacceptable |  |
| The checking method - Checking my child is they were awake during the sleep period but gradually extending the amount of time between checks                                    | Very acceptable<br>Acceptable<br>Neither acceptable nor unacceptable<br>Unacceptable<br>Very unacceptable |  |
| The bedtime pass method - Giving my child a 'bedtime pass' which they can use to come out of their room once or twice during the settling period                                | Very acceptable<br>Acceptable<br>Neither acceptable nor unacceptable<br>Unacceptable<br>Very unacceptable |  |
| The bedtime fading method - Setting the time my child is naturally falling asleep as their temporary bedtime and then moving the bedtime earlier once they are happily settling | Very acceptable<br>Acceptable<br>Neither acceptable nor unacceptable<br>Unacceptable<br>Very unacceptable |  |
| Rewarding my child to encourage positive sleep behaviour                                                                                                                        | Very acceptable<br>Acceptable<br>Neither acceptable nor unacceptable<br>Unacceptable<br>Very unacceptable |  |
| Limit setting or ignoring child's demands if it is safe to do so e.g. requests for another drink or story                                                                       | Very acceptable<br>Acceptable<br>Neither acceptable nor unacceptable<br>Unacceptable<br>Very unacceptable |  |
| Get your child to draw or write down any worries they may have                                                                                                                  | Very acceptable<br>Acceptable<br>Neither acceptable nor unacceptable<br>Unacceptable<br>Very unacceptable |  |
| Using relaxation/visual imagery techniques                                                                                                                                      | Very acceptable<br>Acceptable<br>Neither acceptable nor unacceptable                                      |  |

|                                                           |                                                                                                           |  |
|-----------------------------------------------------------|-----------------------------------------------------------------------------------------------------------|--|
|                                                           | Unacceptable<br>Very unacceptable                                                                         |  |
| Using social stories, role play or imagination techniques | Very acceptable<br>Acceptable<br>Neither acceptable nor unacceptable<br>Unacceptable<br>Very unacceptable |  |
| Anything else? If so, please describe...                  | Very acceptable<br>Acceptable<br>Neither acceptable nor unacceptable<br>Unacceptable<br>Very unacceptable |  |

SECTION THREE: We hope to include questions (similar to the questions in Sections One and Two) in our final online sleep programme so that we can know if parents are finding the sleep programme helpful and easy to use. Please answer the questions below, in Section three, to tell us what you think about the questions we hope to ask.

| Item number and question                                                                                                                                   | Response options                                                                                                |
|------------------------------------------------------------------------------------------------------------------------------------------------------------|-----------------------------------------------------------------------------------------------------------------|
| 1) Do you think that the time it takes to complete the questions is                                                                                        | Far too long<br>A little too long<br>About right<br>A little too short<br>Far too short                         |
| 2) We want parents to be able to understand the questions we ask. How do you find the wording/language used in the questions?                              | Very difficult [please specify any specific words or language]<br>Difficult<br>About right<br>Easy<br>Very easy |
| 3) Do you think there are any other questions we should be asking too, so that we can better understand parents' experience of using this sleep programme? | Yes [If so, please provide any relevant examples]<br>No                                                         |
| 4) If there is anything else you would like to tell us or any other comments that you wish to add please include them here:                                |                                                                                                                 |

Thank you very much for taking the time to complete these questions about the Castle Online Sleep Intervention. Your participation and feedback is incredibly useful.

If you have any further questions or wish to provide any additional feedback please do not hesitate to contact Luci Wiggs ([lwiggs@brookes.ac.uk](mailto:lwiggs@brookes.ac.uk)).

### Appendix 3. Child sleep interview schedule

How do you feel about going to bed/sleep?

What sleep problems, if any, would you most like help with?

Do you have any problems with going to bed/sleep?

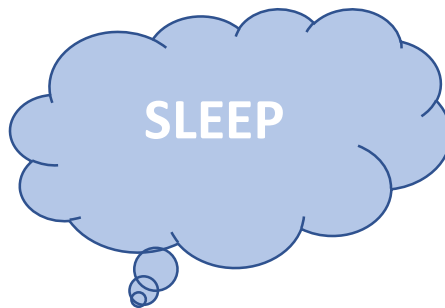

Are there any special problems because of your epilepsy/seizures?

Are there any things you've tried to help you with sleep? What things were helpful? Why?

What things were not helpful? Why?

Is there anything else about your sleep that you think is important but hasn't been mentioned?
